# Supplementary material
Source: PubMed Central journal article supplement (PMC1863440)

(a)

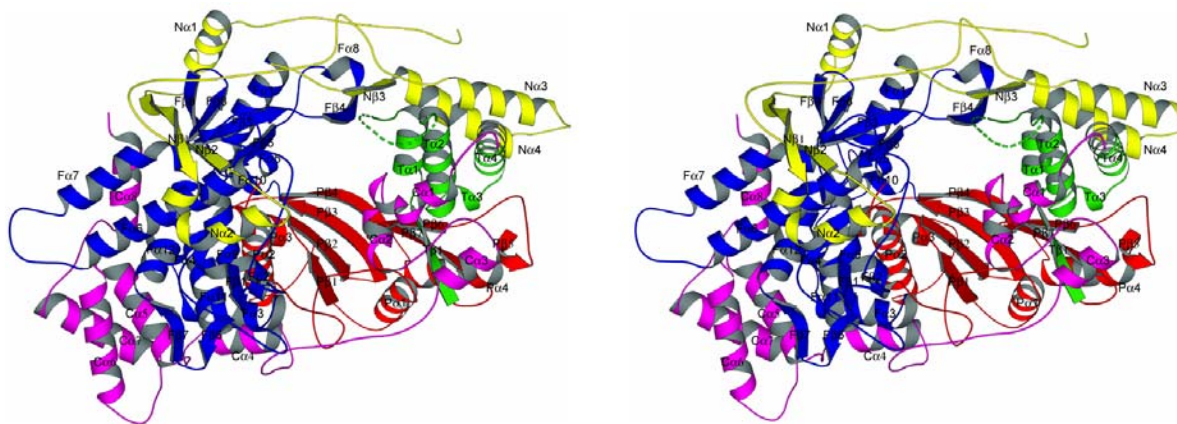

(b)

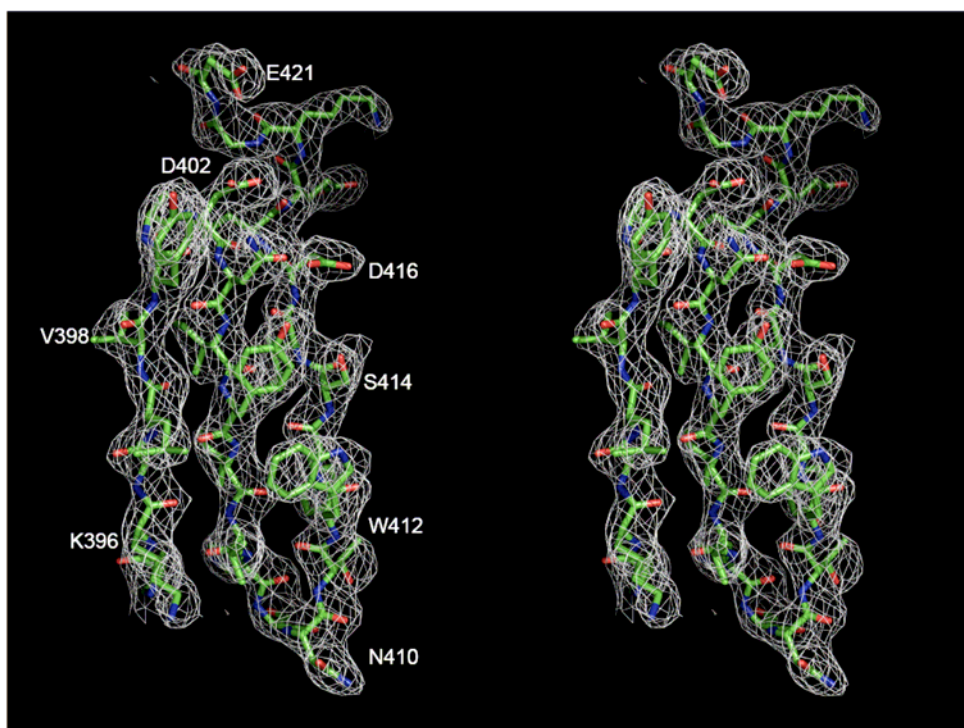

Supplement: pnas_0611599104_2.pdf [file pnas_0611599104_2.pdf]

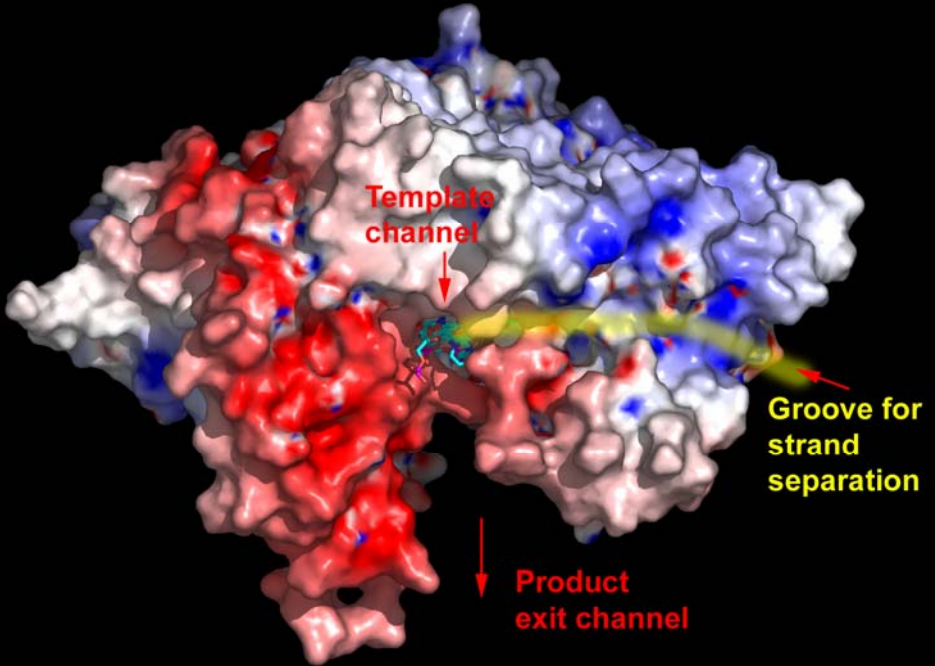

**Template  
channel**

**Groove for  
strand  
separation**

**Product  
exit channel**

Supplement: pnas_0611599104_4.pdf [file pnas_0611599104_4.pdf]
